# Supplementary material for: Theoretical investigation on the influence of temperature and crystallographic orientation on the breaking behavior of copper nanowire
Source: Royal Society of Chemistry journal article supplement (doi:10.1039/b902795e), 2009-01-01
Supplement: b902795e.pdf [file b902795e.pdf]

Theoretical investigation on the temperature and crystallographic  
orientation influence on the breaking behavior of the copper nanowire

## Supporting Information

*Yunhong Liu<sup>1</sup>, Fenyng Wang<sup>1</sup>, Jianwei Zhao<sup>1\*</sup>, Luyun Jiang<sup>1</sup>, Manabu Kiguchi<sup>2</sup> and  
Kei Murakoshi<sup>2</sup>*

<sup>1</sup> Key Laboratory of analytical Chemistry of Life Science (Ministry of Education), School of  
Chemistry and Chemical Engineering, Nanjing University, Nanjing, China 210008

<sup>2</sup> Division of Chemistry, Graduate School of Science, Hokkaido University, Sapporo, Japan

\*Corresponding author. Email: [zhaojw@nju.edu.cn](mailto:zhaojw@nju.edu.cn), Tel/fax: +86-25-83596523

The whole deformation processes of copper nanowires are given as .gif files.

Video 1: A short movie of whole breaking process of formation of an atomic copper chain along [100] orientation at 100 K.

Video 2: A short movie of whole breaking process of formation of an atomic copper chain along [100] orientation at 200 K.

Video 3: A short movie of whole breaking process of formation of an atomic copper chain along [100] orientation at 300 K.

Video 4: A short movie of whole breaking process of formation of an atomic copper chain along [110] orientation at 100 K.

Video 5: A short movie of whole breaking process of formation of an atomic copper chain along [110] orientation at 200 K.

Video 6: A short movie of whole breaking process of formation of an atomic copper chain along [110] orientation at 300 K.

Video 7: A short movie of whole breaking process of formation of an atomic copper chain along [111] orientation at 100 K.

Video 8: A short movie of whole breaking process of formation of an atomic copper chain along [111] orientation at 300 K.

Video 9: A short movie of whole breaking process of formation of an atomic copper chain along [111] orientation at 300 K.
